# Supplementary material for: Modeling Cyanobacteria Vertical Migration
Source: MDPI journal article supplement (doi:10.3390/w14060953), 2022-03-18
Supplement: s1 [file s1]

# Supplementary Materials

## Modeling Cyanobacteria Vertical Migration

Corina Overman\* and Scott Wells

Department of Civil and Environmental Engineering, Portland State University, P.O. Box 751, Portland, OR 97207-0751, USA; wellss@pdx.edu

\* Correspondence: corinaoverman@gmail.com

### 1. Model Equations

**Table S1.** Predefined velocity models used in continuum framework.

| Model                 | Equations                                                                                                                                                                                                                                                            |    |
|-----------------------|----------------------------------------------------------------------------------------------------------------------------------------------------------------------------------------------------------------------------------------------------------------------|----|
| Time-varying velocity | $v_{p_i}^n > 0, \quad c_i^{n+1} = \frac{D_z \Delta t}{\Delta z^2} (c_{i+1}^n - 2c_i^n + c_{i-1}^n) - \frac{\Delta t}{\Delta z} (v_{p_i}^n c_i^n - v_{p_{i-1}}^n c_{i-1}^n) + (\mu_{net} \Delta t + 1) c_i^n$                                                         | 19 |
|                       | $v_p < 0, \quad c_i^{n+1} = \frac{D_z \Delta t}{\Delta z^2} (c_{i+1}^n - 2c_i^n + c_{i-1}^n) - \frac{\Delta t}{\Delta z} (v_{p_{i+1}}^n c_{i+1}^n - v_{p_i}^n c_i^n) + (\mu_{net} \Delta t + 1) c_i^n$                                                               | 20 |
|                       | $v_p(t) = A \frac{2\pi}{86,400 \text{ s}} \cos\left(\frac{2\pi}{86,400 \text{ s}} t + \phi\right)$                                                                                                                                                                   | 22 |
| Belov & Giles [4]     | $v_{p_i}^n > 0, \quad c_i^{n+1} = \frac{D_z \Delta t}{\Delta z^2} (c_{i+1}^n - 2c_i^n + c_{i-1}^n) - \frac{\Delta t}{\Delta z} (v_{p_i}^n c_i^n - v_{p_{i-1}}^n c_{i-1}^n) + (\mu_{net} \Delta t + 1) c_i^n$                                                         | 19 |
|                       | $v_p < 0, \quad c_i^{n+1} = \frac{D_z \Delta t}{\Delta z^2} (c_{i+1}^n - 2c_i^n + c_{i-1}^n) - \frac{\Delta t}{\Delta z} (v_{p_{i+1}}^n c_{i+1}^n - v_{p_i}^n c_i^n) + (\mu_{net} \Delta t + 1) c_i^n$                                                               | 20 |
|                       | $v_p(t, z) = \begin{cases} A \frac{2\pi}{86,400 \text{ s}} \cos\left(\frac{2\pi}{86,400 \text{ s}} t + \phi\right) e^{-\alpha(H-z)}, & I_0 > 0 \\ A \frac{2\pi}{86,400 \text{ s}} \cos\left(\frac{2\pi}{86,400 \text{ s}} t + \phi\right), & I_0 \leq 0 \end{cases}$ | 23 |

**Table S2.** Predefined velocity models used in particle-tracking framework.

| Model                 | Equations                                                                                                                                                                                                                                                            |    |
|-----------------------|----------------------------------------------------------------------------------------------------------------------------------------------------------------------------------------------------------------------------------------------------------------------|----|
| Time-varying velocity | $z_{p_i}^{n+1} = z_{p_i}^n + v_{p_i}^n \Delta t + R \sqrt{6 D_{z_i}^n \Delta t}$                                                                                                                                                                                     | 21 |
|                       | $v_p(t) = A \frac{2\pi}{86,400 \text{ s}} \cos\left(\frac{2\pi}{86,400 \text{ s}} t + \phi\right)$                                                                                                                                                                   | 22 |
| Belov & Giles [4]     | $z_{p_i}^{n+1} = z_{p_i}^n + v_{p_i}^n \Delta t + R \sqrt{6 D_{z_i}^n \Delta t}$                                                                                                                                                                                     | 21 |
|                       | $v_p(t, z) = \begin{cases} A \frac{2\pi}{86,400 \text{ s}} \cos\left(\frac{2\pi}{86,400 \text{ s}} t + \phi\right) e^{-\alpha(H-z)}, & I_0 > 0 \\ A \frac{2\pi}{86,400 \text{ s}} \cos\left(\frac{2\pi}{86,400 \text{ s}} t + \phi\right), & I_0 \leq 0 \end{cases}$ | 23 |

**Table S3.** Converted parameter values from Visser et al. [13] using conversion factor of  $2 \mu\text{mol photon s}^{-1}/\text{Watt}$  [48].

| Parameter       | $I_c,$<br>$\text{W m}^{-2}$ | $c_1,$<br>$\text{s}^2 \text{m}^{-3}$ | $c_2,$<br>$\text{kg m}^{-3} \text{s}^{-2}$ | $f_1,$<br>$\text{s}^{-1}$ | $f_2,$<br>$\text{kg m}^{-3} \text{s}^{-1}$ |
|-----------------|-----------------------------|--------------------------------------|--------------------------------------------|---------------------------|--------------------------------------------|
| Converted Value | 5.45                        | $5.333 \times 10^{-5}$               | $-2.75 \times 10^{-4}$                     | $-1.587 \times 10^{-}$    | 0.0164                                     |

**Table S4.** Dynamic velocity models used in continuum framework.

| Model                           | Equations                                                                                                                                                                                                   |    |
|---------------------------------|-------------------------------------------------------------------------------------------------------------------------------------------------------------------------------------------------------------|----|
| Growth kinetics                 | $v_p = \frac{2gr^2(\rho_c - \rho')A}{9\phi n}$                                                                                                                                                              | 2  |
|                                 | $\mu_{net} = \mu_{g,max}F(I) - \mu_r - \mu_e - \mu_m$                                                                                                                                                       | 25 |
|                                 | $\rho_{c_i}^{n+1} = \rho_{c_i}^n \mu_{net_i} \Delta t + \rho_{c_i}^n$                                                                                                                                       | 28 |
|                                 | $c_i^{n+1} = \frac{D_z \Delta t}{\Delta z^2} (c_{i+1}^n - 2c_i^n + c_{i-1}^n) - \frac{\Delta t}{\Delta z} ( v_{p_i}^n c_i^n  - v_{p_B}^n c_{i+1}^n - v_{p_T}^n c_{i-1}^n) + (\mu_{net} \Delta t + 1) c_i^n$ | 29 |
|                                 | $v_{p_B}^n = \begin{cases} v_{p_{i+1}}^n, & v_{p_{i+1}}^n < 0 \\ 0, & v_{p_{i+1}}^n \geq 0 \end{cases}$                                                                                                     | 30 |
|                                 | $v_{p_T}^n = \begin{cases} v_{p_{i-1}}^n, & v_{p_{i-1}}^n > 0 \\ 0, & v_{p_{i-1}}^n \leq 0 \end{cases}$                                                                                                     | 31 |
|                                 | $F(I) = \frac{e}{\alpha \Delta z} [e^{-\gamma_2} - e^{-\gamma_1}]$                                                                                                                                          | 32 |
|                                 | $\gamma_1 = \frac{(1-\beta)I_0}{I_s} e^{-\alpha(i-1)\Delta z}$                                                                                                                                              | 33 |
|                                 | $\gamma_2 = \frac{(1-\beta)I_0}{I_s} e^{-\alpha(i)\Delta z}$                                                                                                                                                | 34 |
| Growth kinetics with time decay | $v_p = \frac{2gr^2(\rho_c - \rho')A}{9\phi n}$                                                                                                                                                              | 2  |
|                                 | $\mu_{net} = \mu_{g,max}F(I) - \mu_r - \mu_e - \mu_m$                                                                                                                                                       | 25 |
|                                 | $\rho_{c_i}^{n+1} = \rho_{c_i}^n \mu_{net_i} \Delta t + \rho_{c_i}^n$                                                                                                                                       | 28 |
|                                 | $c_i^{n+1} = \frac{D_z \Delta t}{\Delta z^2} (c_{i+1}^n - 2c_i^n + c_{i-1}^n) - \frac{\Delta t}{\Delta z} ( v_{p_i}^n c_i^n  - v_{p_B}^n c_{i+1}^n - v_{p_T}^n c_{i-1}^n) + (\mu_{net} \Delta t + 1) c_i^n$ | 29 |
|                                 | $v_{p_B}^n = \begin{cases} v_{p_{i+1}}^n, & v_{p_{i+1}}^n < 0 \\ 0, & v_{p_{i+1}}^n \geq 0 \end{cases}$                                                                                                     | 30 |
|                                 | $v_{p_T}^n = \begin{cases} v_{p_{i-1}}^n, & v_{p_{i-1}}^n > 0 \\ 0, & v_{p_{i-1}}^n \leq 0 \end{cases}$                                                                                                     | 31 |
|                                 | $F(I) = \frac{e}{\alpha \Delta z} [e^{-\gamma_2} - e^{-\gamma_1}]$                                                                                                                                          | 32 |
|                                 | $\gamma_1 = \frac{(1-\beta)I_0}{I_s} e^{-\alpha(i-1)\Delta z}$                                                                                                                                              | 33 |
|                                 | $\gamma_2 = \frac{(1-\beta)I_0}{I_s} e^{-\alpha(i)\Delta z}$                                                                                                                                                | 34 |
|                                 | $\rho_{c_i}^{n+1} = \frac{\sum_{q=-1}^Q \rho_{c_i}^{n-q} W^q}{\sum_{q=-1}^Q W^q}$                                                                                                                           | 35 |
|                                 | $W^q = e^{-k(t^{n+1} - t^{n-q})}$                                                                                                                                                                           | 36 |
|                                 |                                                                                                                                                                                                             |    |
|                                 |                                                                                                                                                                                                             |    |
|                                 |                                                                                                                                                                                                             |    |
| Visser et al. [13]              | $v_p = \frac{2gr^2(\rho_c - \rho')A}{9\phi n}$                                                                                                                                                              | 2  |
|                                 | $c_i^{n+1} = \frac{D_z \Delta t}{\Delta z^2} (c_{i+1}^n - 2c_i^n + c_{i-1}^n) - \frac{\Delta t}{\Delta z} ( v_{p_i}^n c_i^n  - v_{p_B}^n c_{i+1}^n - v_{p_T}^n c_{i-1}^n) + (\mu_{net} \Delta t + 1) c_i^n$ | 29 |
|                                 | $v_{p_B}^n = \begin{cases} v_{p_{i+1}}^n, & v_{p_{i+1}}^n < 0 \\ 0, & v_{p_{i+1}}^n \geq 0 \end{cases}$                                                                                                     | 30 |
|                                 | $v_{p_T}^n = \begin{cases} v_{p_{i-1}}^n, & v_{p_{i-1}}^n > 0 \\ 0, & v_{p_{i-1}}^n \leq 0 \end{cases}$                                                                                                     | 31 |
|                                 | $\rho_{c_i}^{n+1} = (c_1 I e^{-I/I_0} + c_2) \Delta t + \rho_{c_i}^n$                                                                                                                                       | 37 |
|                                 | $\rho_{c_i}^{n+1} = (f_1(\rho_{c_i}^n + \rho *_{c_i}^n) + f_2) \Delta t + \rho_{c_i}^n$                                                                                                                     | 38 |
|                                 | $I_i = \frac{I_0(1-\beta)}{-k\Delta z} (e^{-\alpha z_i} - e^{-\alpha z_{i-1}})$                                                                                                                             | 39 |

|                                   |                                                                                                                                                                                                             |    |
|-----------------------------------|-------------------------------------------------------------------------------------------------------------------------------------------------------------------------------------------------------------|----|
| Light function                    | $v_p = \frac{2gr^2(\rho_c - \rho')A}{9\phi n}$                                                                                                                                                              | 2  |
|                                   | $c_i^{n+1} = \frac{D_z \Delta t}{\Delta z^2} (c_{i+1}^n - 2c_i^n + c_{i-1}^n) - \frac{\Delta t}{\Delta z} ( v_{p_i}^n c_i^n  - v_{p_B}^n c_{i+1}^n - v_{p_T}^n c_{i-1}^n) + (\mu_{net} \Delta t + 1) c_i^n$ | 29 |
|                                   | $v_{p_B}^n = \begin{cases} v_{p_{i+1}}^n, & v_{p_{i+1}}^n < 0 \\ 0, & v_{p_{i+1}}^n \geq 0 \end{cases}$                                                                                                     | 30 |
|                                   | $v_{p_T}^n = \begin{cases} v_{p_{i-1}}^n, & v_{p_{i-1}}^n > 0 \\ 0, & v_{p_{i-1}}^n \leq 0 \end{cases}$                                                                                                     | 31 |
|                                   | $F(I) = \frac{e}{\alpha \Delta z} [e^{-\gamma_2} - e^{-\gamma_1}]$                                                                                                                                          | 32 |
|                                   | $\gamma_1 = \frac{(1-\beta)I_0}{I_s} e^{-\alpha(i-1)\Delta z}$                                                                                                                                              | 33 |
|                                   | $\gamma_2 = \frac{(1-\beta)I_0}{I_s} e^{-\alpha(i)\Delta z}$                                                                                                                                                | 34 |
|                                   | $\rho_{c_i}^{n+1} = (c_1 F(I_i^n) - c_2) \Delta t + \rho_{c_i}^n$                                                                                                                                           | 42 |
| Light function<br>with time decay | $v_p = \frac{2gr^2(\rho_c - \rho')A}{9\phi n}$                                                                                                                                                              | 2  |
|                                   | $c_i^{n+1} = \frac{D_z \Delta t}{\Delta z^2} (c_{i+1}^n - 2c_i^n + c_{i-1}^n) - \frac{\Delta t}{\Delta z} ( v_{p_i}^n c_i^n  - v_{p_B}^n c_{i+1}^n - v_{p_T}^n c_{i-1}^n) + (\mu_{net} \Delta t + 1) c_i^n$ | 29 |
|                                   | $v_{p_B}^n = \begin{cases} v_{p_{i+1}}^n, & v_{p_{i+1}}^n < 0 \\ 0, & v_{p_{i+1}}^n \geq 0 \end{cases}$                                                                                                     | 30 |
|                                   | $v_{p_T}^n = \begin{cases} v_{p_{i-1}}^n, & v_{p_{i-1}}^n > 0 \\ 0, & v_{p_{i-1}}^n \leq 0 \end{cases}$                                                                                                     | 31 |
|                                   | $F(I) = \frac{e}{\alpha \Delta z} [e^{-\gamma_2} - e^{-\gamma_1}]$                                                                                                                                          | 32 |
|                                   | $\gamma_1 = \frac{(1-\beta)I_0}{I_s} e^{-\alpha(i-1)\Delta z}$                                                                                                                                              | 33 |
|                                   | $\gamma_2 = \frac{(1-\beta)I_0}{I_s} e^{-\alpha(i)\Delta z}$                                                                                                                                                | 34 |
|                                   | $\rho_{c_i}^{n+1} = \frac{\sum_{q=-1}^Q \rho_{c_i}^{n-q} W^q}{\sum_{q=-1}^Q W^q}$                                                                                                                           | 35 |
|                                   | $W^q = e^{-k(t^{n+1} - t^{n-q})}$                                                                                                                                                                           | 36 |
|                                   | $\rho_{c_i}^{n+1} = (c_1 F(I_i^n) - c_2) \Delta t + \rho_{c_i}^n$                                                                                                                                           | 42 |

Table S5. Dynamic velocity models used in particle-tracking framework.

| Model              | Equations                                                                       |    |
|--------------------|---------------------------------------------------------------------------------|----|
| Growth kinetics    | $v_p = \frac{2gr^2(\rho_c - \rho')A}{9\phi n}$                                  | 2  |
|                    | $z_{p_i}^{n+1} = z_{p_i}^n + v_{p_i}^n \Delta t + R \sqrt{6D_{z_i}^n \Delta t}$ | 21 |
|                    | $\mu_{net} = \mu_{g,max} F(I) - \mu_r - \mu_e - \mu_m$                          | 25 |
|                    | $F(I) = \frac{I}{I_s} e^{-\frac{I}{I_s} + 1}$                                   | 26 |
|                    | $I(z) = (1 - \beta) I_0 e^{-\alpha z}$                                          | 27 |
|                    | $\rho_{c_i}^{n+1} = \rho_{c_i}^n \mu_{net_i}^n \Delta t + \rho_{c_i}^n$         | 28 |
|                    |                                                                                 |    |
| Visser et al. [13] | $v_p = \frac{2gr^2(\rho_c - \rho')A}{9\phi n}$                                  | 2  |
|                    | $z_{p_i}^{n+1} = z_{p_i}^n + v_{p_i}^n \Delta t + R \sqrt{6D_{z_i}^n \Delta t}$ | 21 |
|                    | $I(z) = (1 - \beta) I_0 e^{-\alpha z}$                                          | 27 |
|                    | $\rho_{c_i}^{n+1} = (c_1 I e^{-I/I_0} + c_2) \Delta t + \rho_{c_i}^n$           | 37 |
|                    | $\rho_{c_i}^{n+1} = (f_1(\rho_{c_i}^n + \rho_*) + f_2) \Delta t + \rho_{c_i}^n$ | 38 |

|                |                                                                                |    |
|----------------|--------------------------------------------------------------------------------|----|
| Light function | $v_p = \frac{2gr^2(\rho_c - \rho')A}{9\phi n}$                                 | 2  |
|                | $z_{p_i}^{n+1} = z_{p_i}^n + v_{p_i}^n \Delta t + R\sqrt{6D_{z_i}^n \Delta t}$ | 21 |
|                | $F(I) = \frac{I}{I_s} e^{-\frac{I}{I_s} + 1}$                                  | 26 |
|                | $\rho_{c_i}^{n+1} = (c_1 F(I_i^n) - c_2) \Delta t + \rho_{c_i}^n$              | 42 |

## 2. Model Result Plots

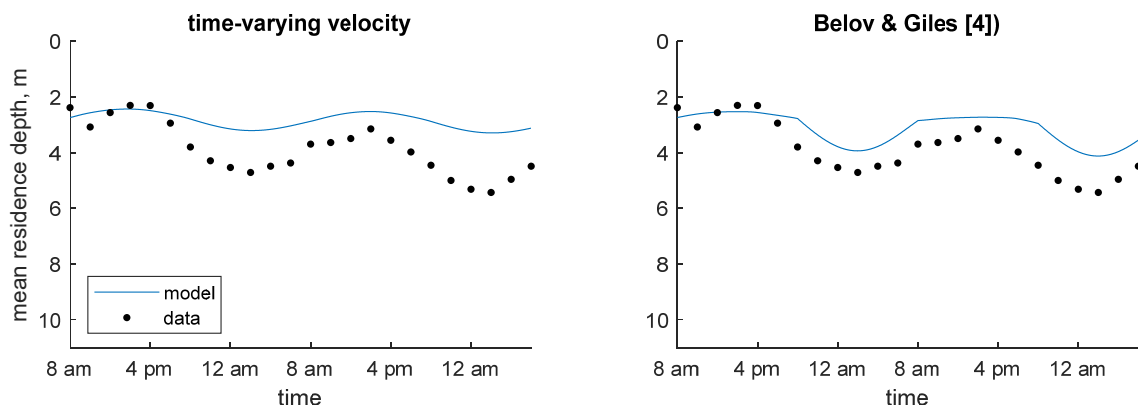

**Figure S1.** Time series of observed and predicted mean residence depth of chlorophyll a concentration in Shennong Stream enclosure site using predefined velocity models (continuum).

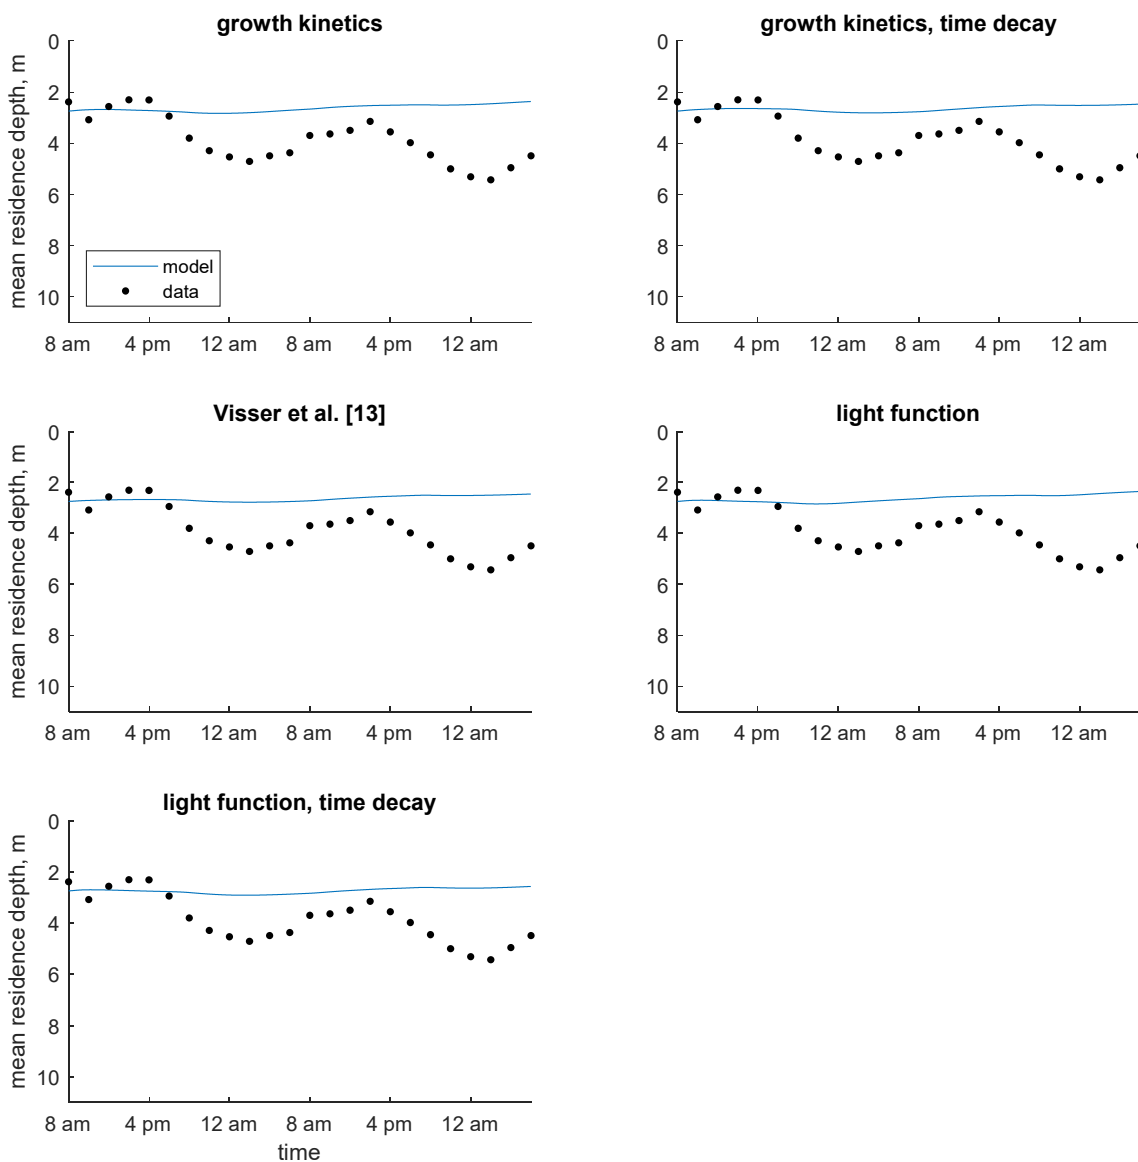

**Figure S2.** Time series of observed and predicted mean residence depth of chlorophyll a concentration in Shennong Stream enclosure site using dynamic velocity models (continuum).

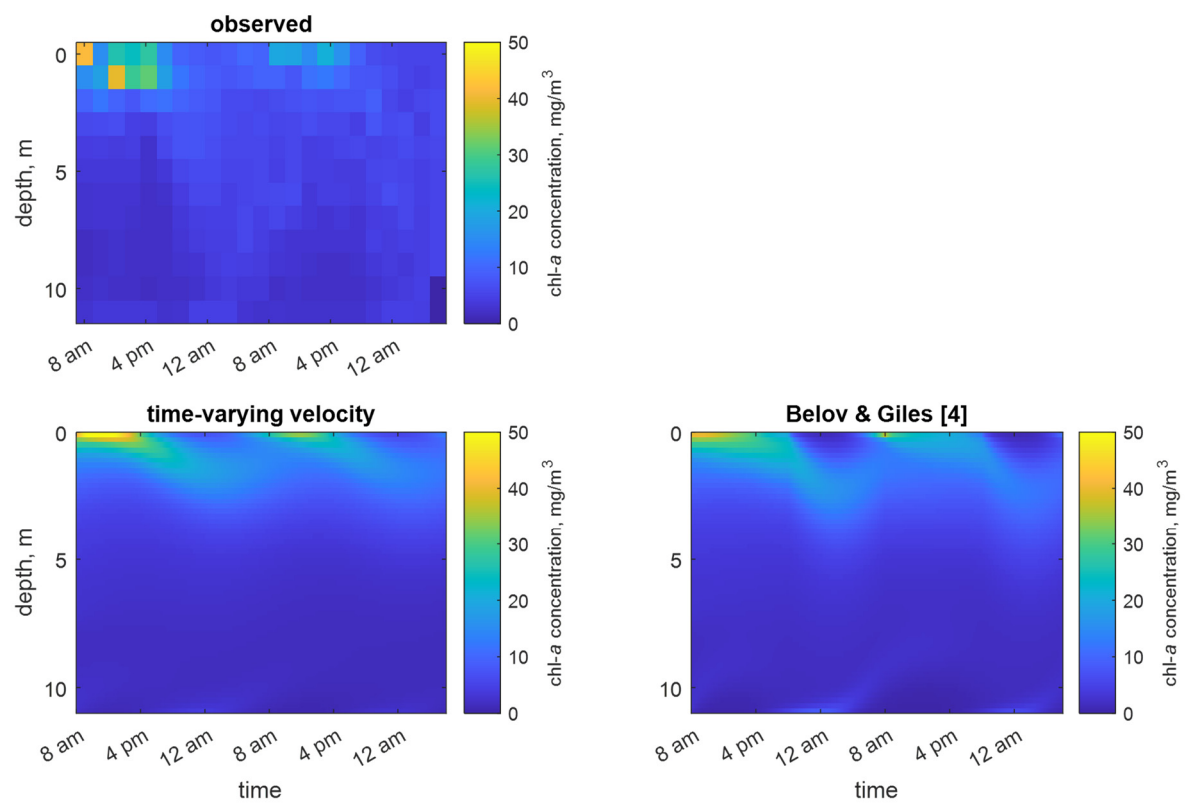

**Figure S3.** Time series of observed and predicted chlorophyll a concentration in Shennong Stream enclosure site using predefined velocity models (continuum).

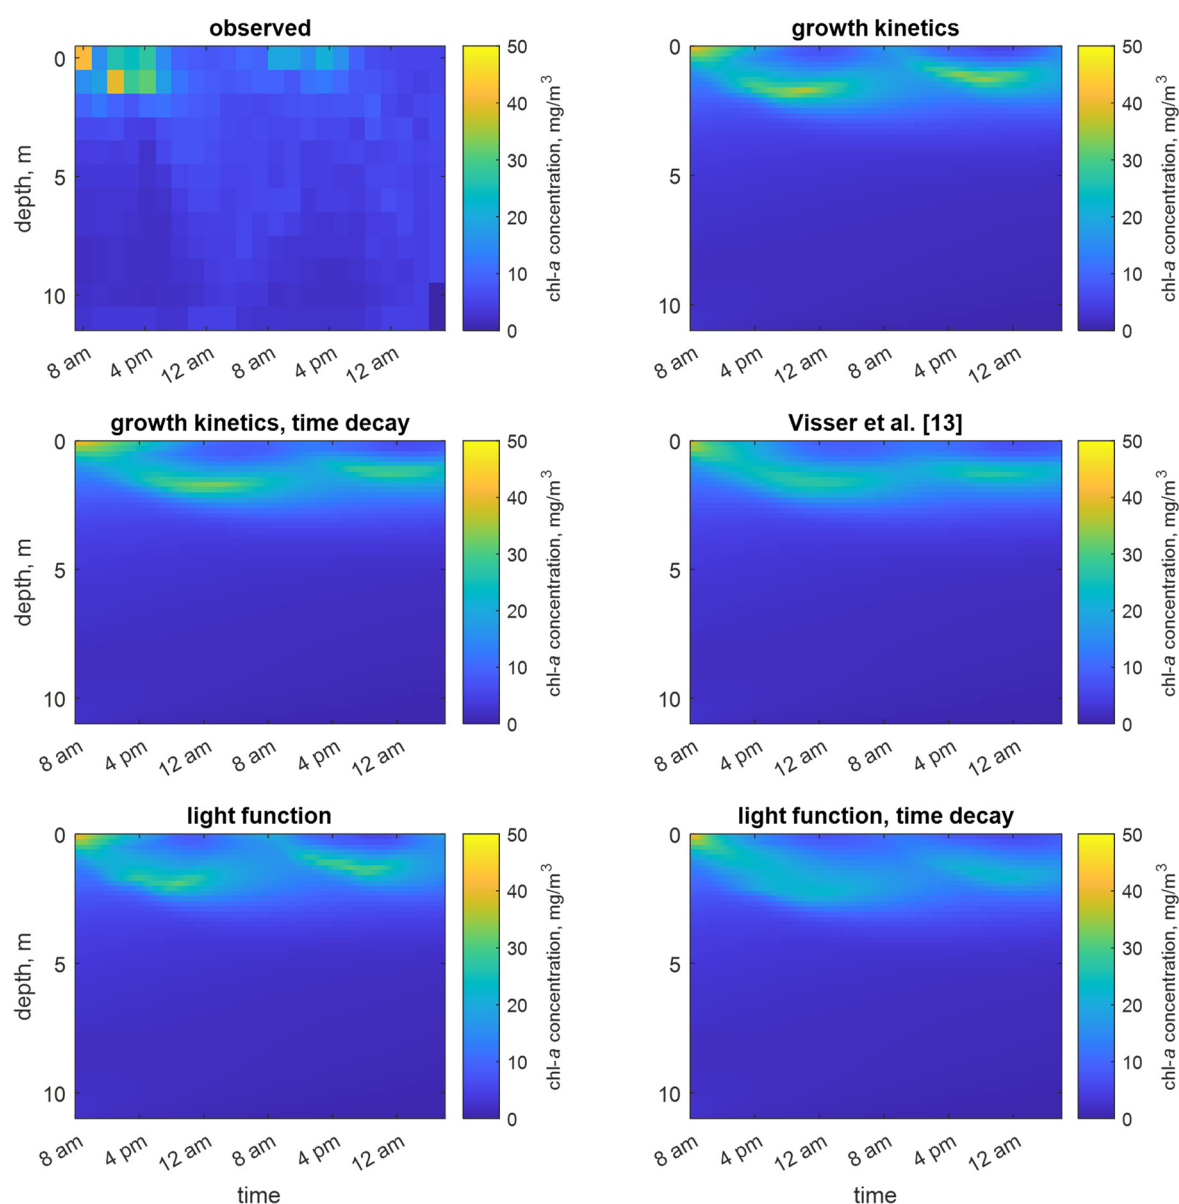

**Figure S4.** Time series of observed and predicted chlorophyll a concentration in Shennong Stream enclosure site using dynamic velocity models (continuum).

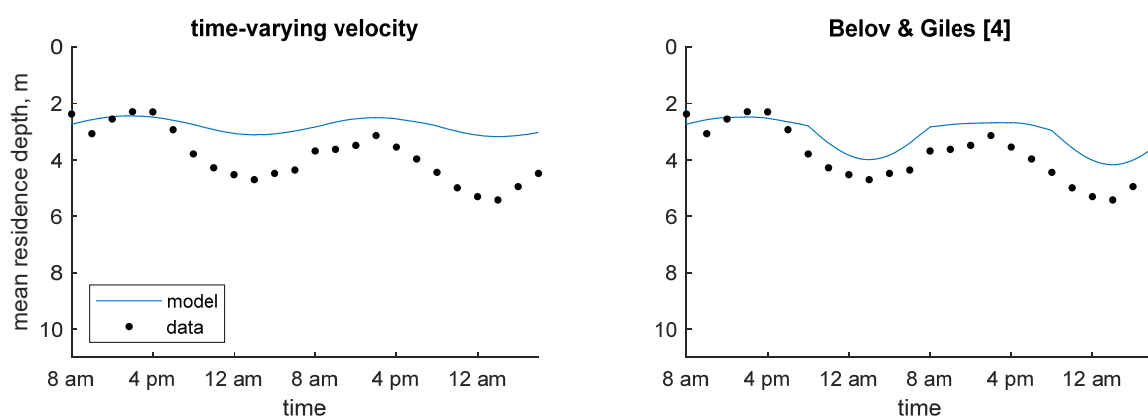

**Figure S5.** Time series of observed and predicted mean residence depth of chlorophyll a concentration in Shennong Stream enclosure site using predefined velocity models (particle-tracking).

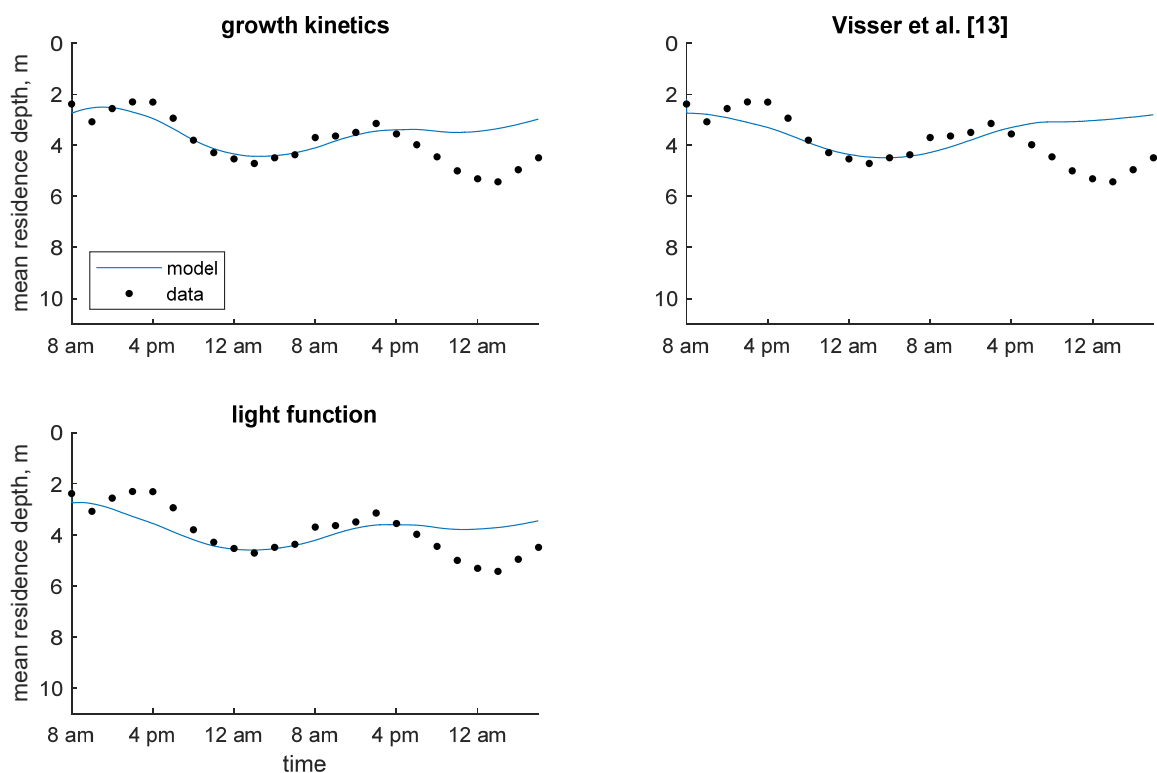

**Figure S6.** Time series of observed and predicted mean residence depth of chlorophyll a concentration in Shennong Stream enclosure site using dynamic velocity models (particle-tracking).

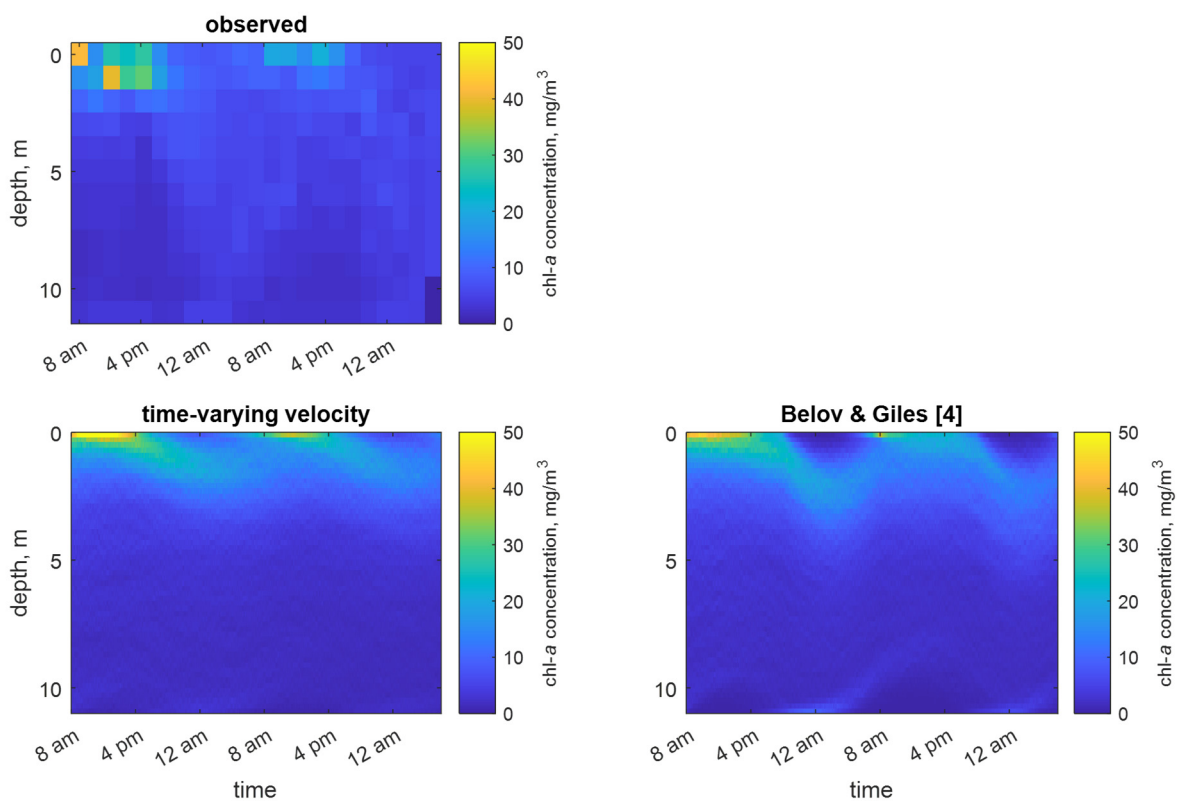

**Figure S7.** Time series of observed and predicted chlorophyll a concentration in Shennong Stream enclosure site using predefined velocity models (particle-tracking).



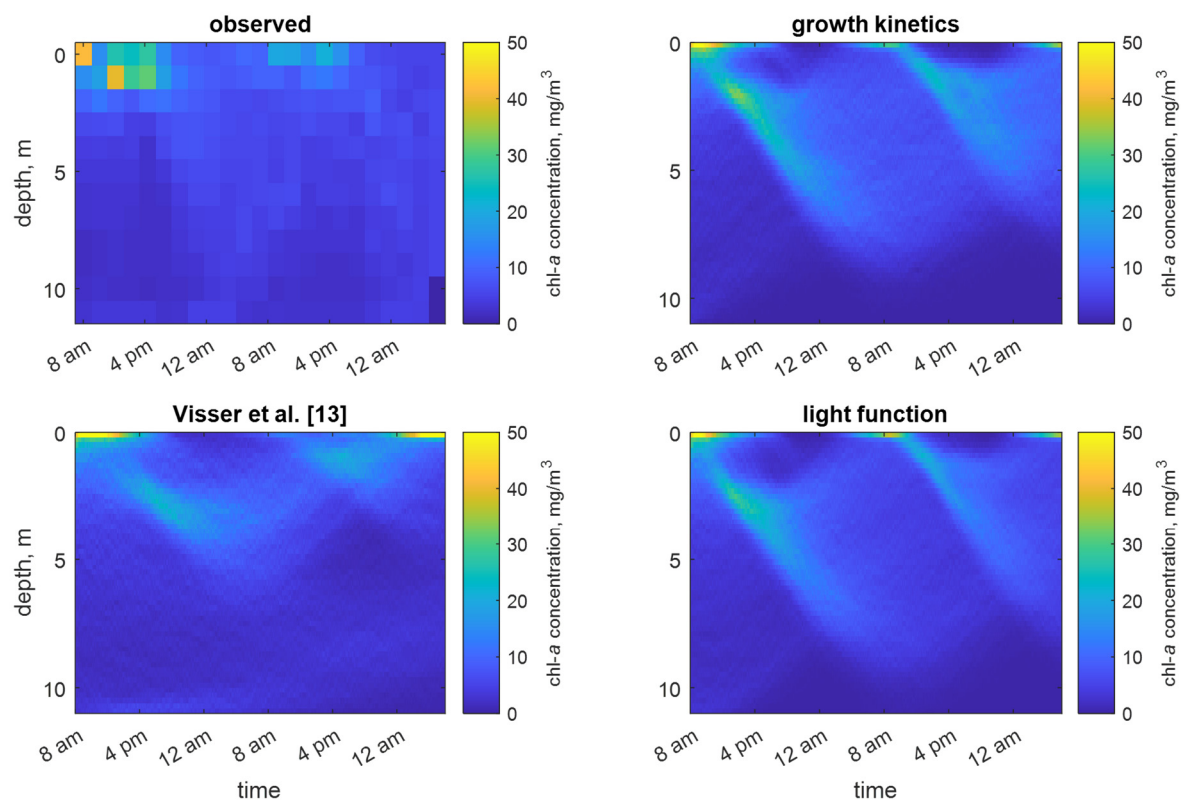

**Figure S8.** Time series of observed and predicted chlorophyll a concentration in Shennong Stream enclosure site using dynamic velocity models (particle-tracking).

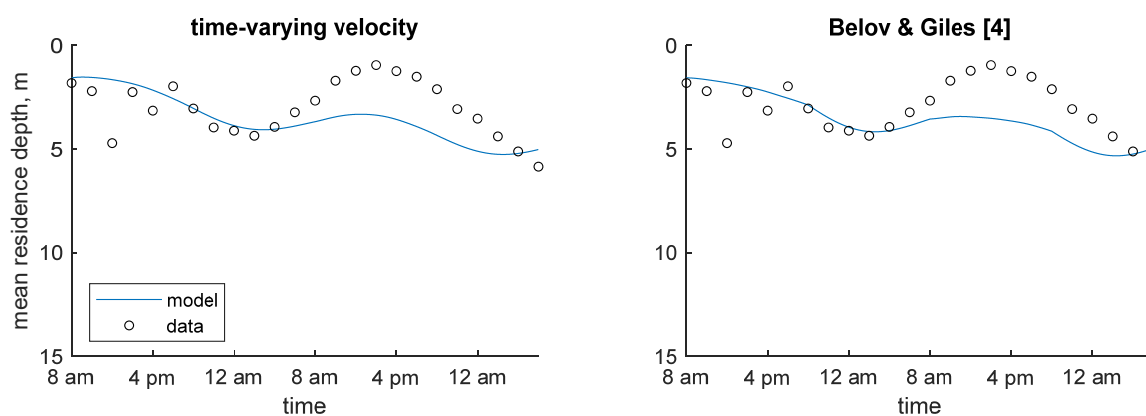

**Figure S9.** Time series of observed and predicted mean residence depth of chlorophyll a concentration in Shennong Stream open water site using predefined velocity models (continuum).

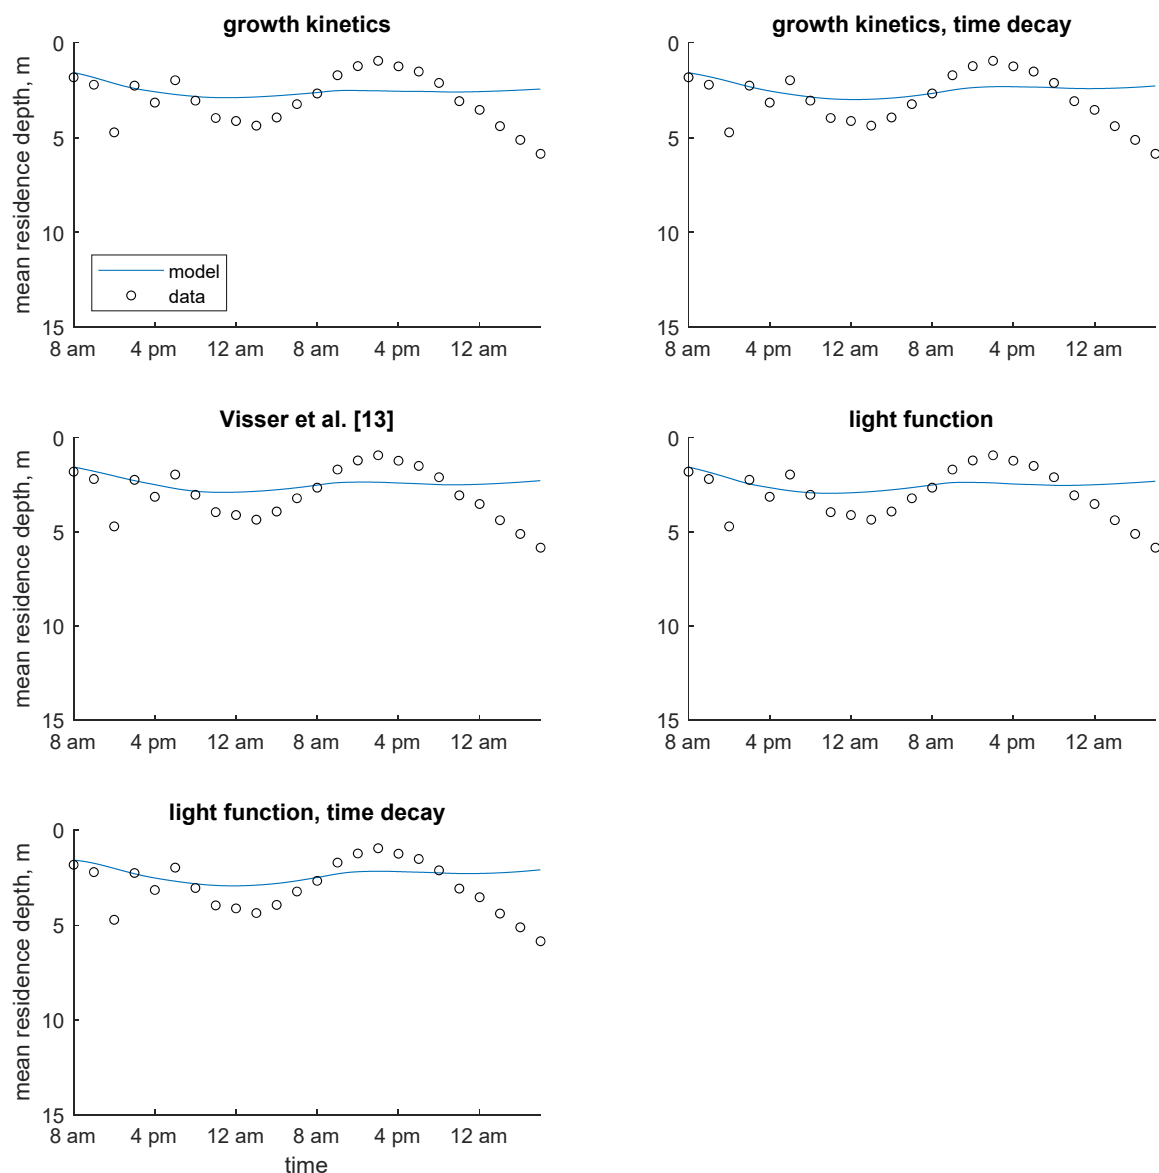

**Figure S10.** Time series of observed and predicted mean residence depth of chlorophyll a concentration in Shennong Stream open water site using dynamic velocity models (continuum).

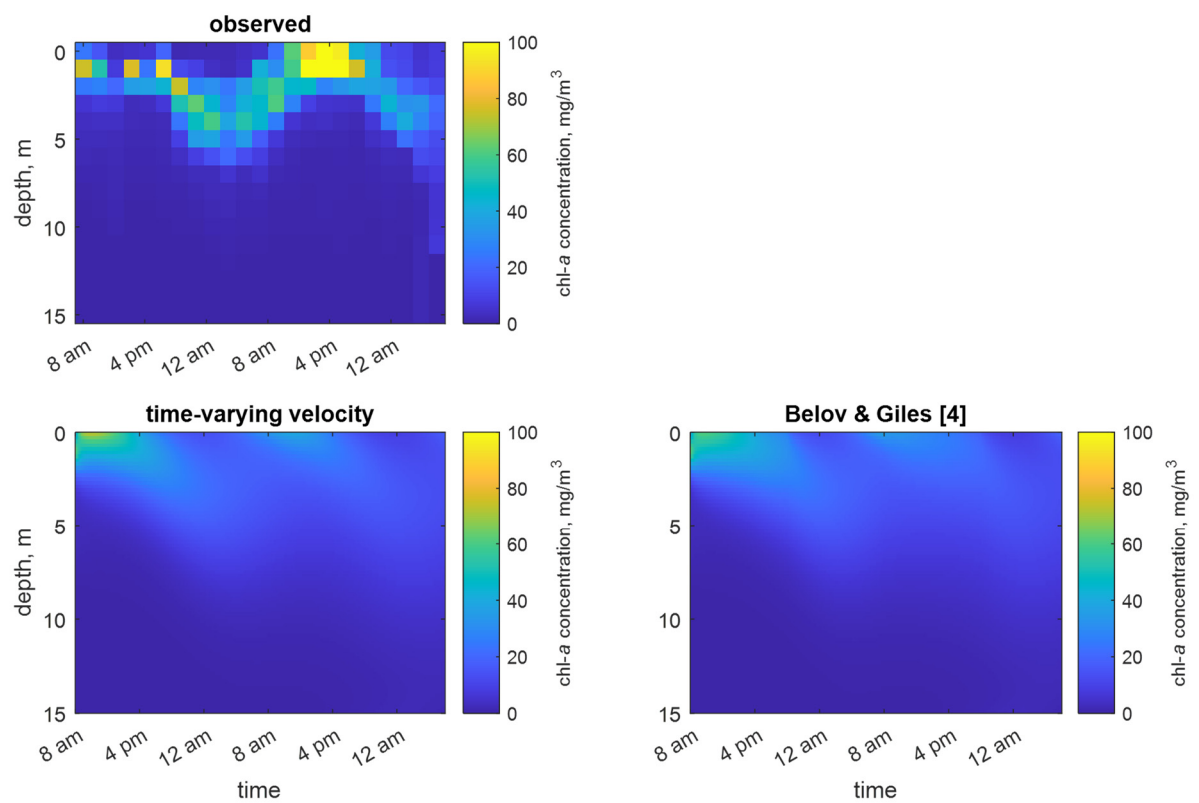

**Figure S11.** Time series of observed and predicted chlorophyll a concentration in Shennong Stream open water site using predefined velocity models (continuum).

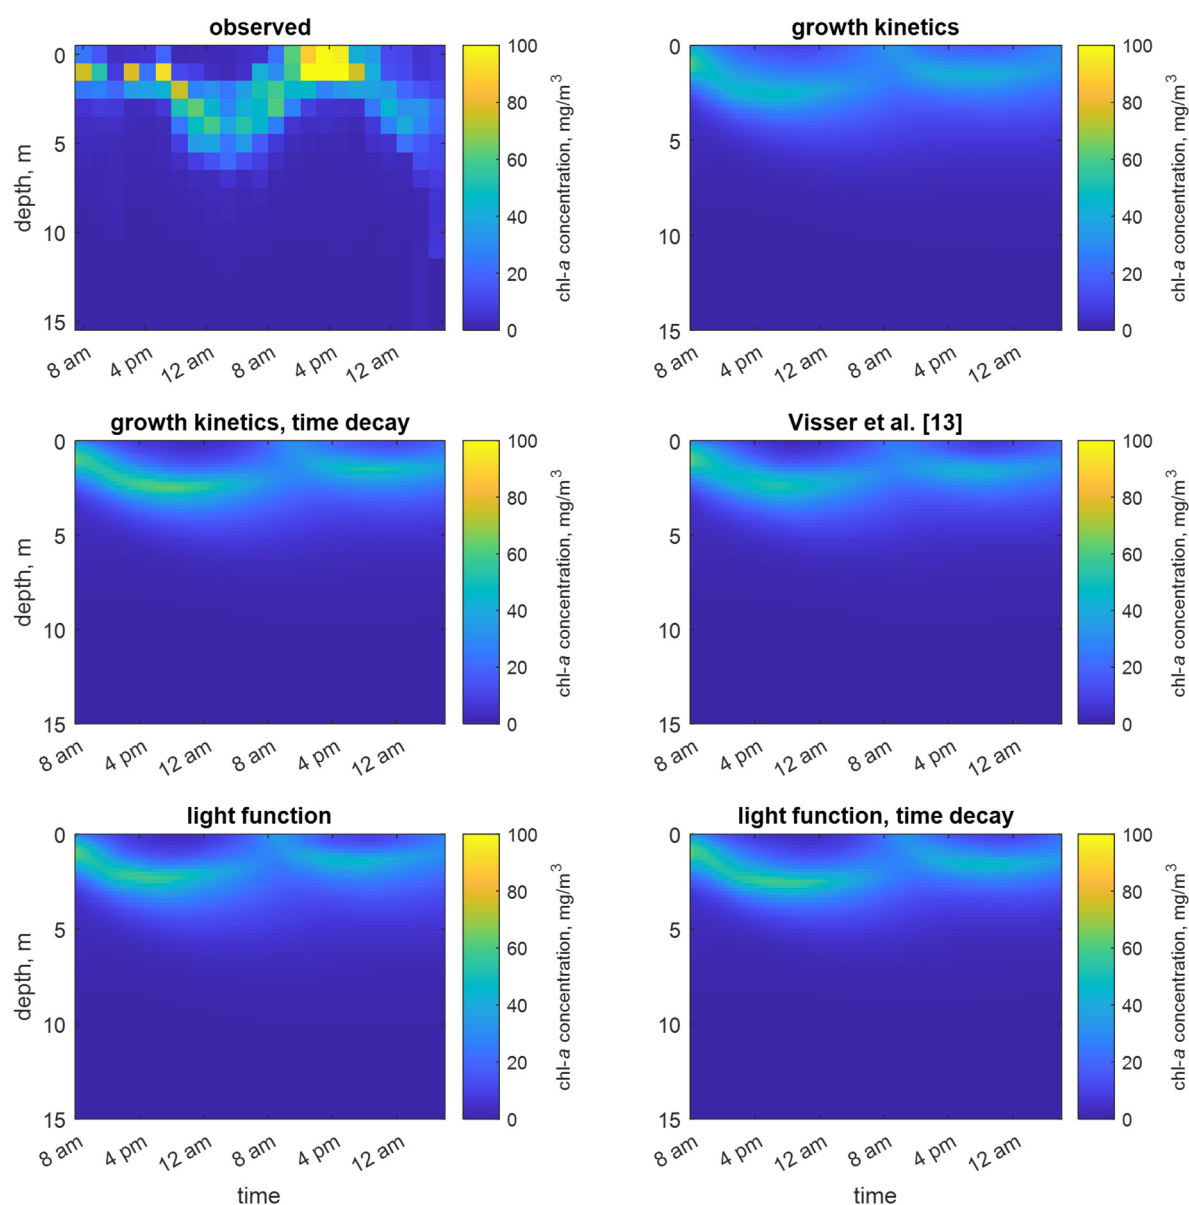

**Figure S12.** Time series of observed and predicted chlorophyll a concentration in Shennong Stream open water site using dynamic velocity models (continuum).

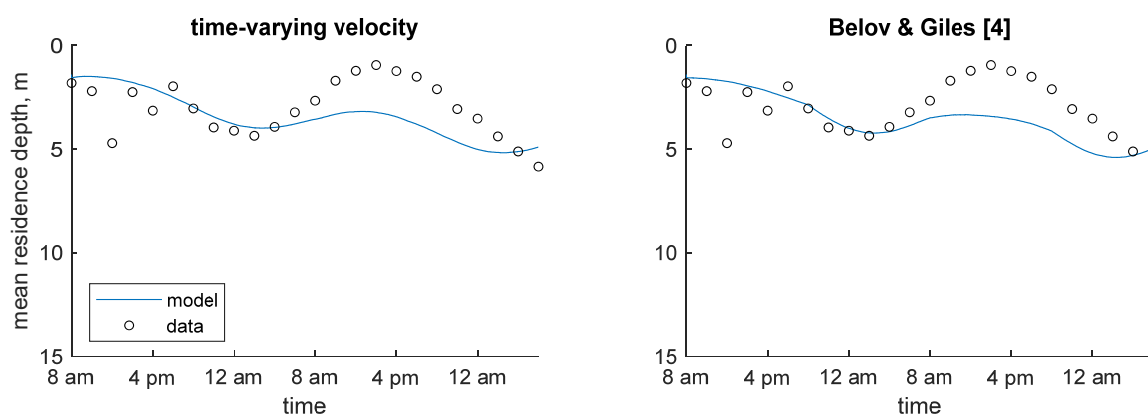

**Figure S13.** Time series of observed and predicted mean residence depth of chlorophyll a concentration in Shennong Stream open water site using predefined velocity models (particle-tracking).

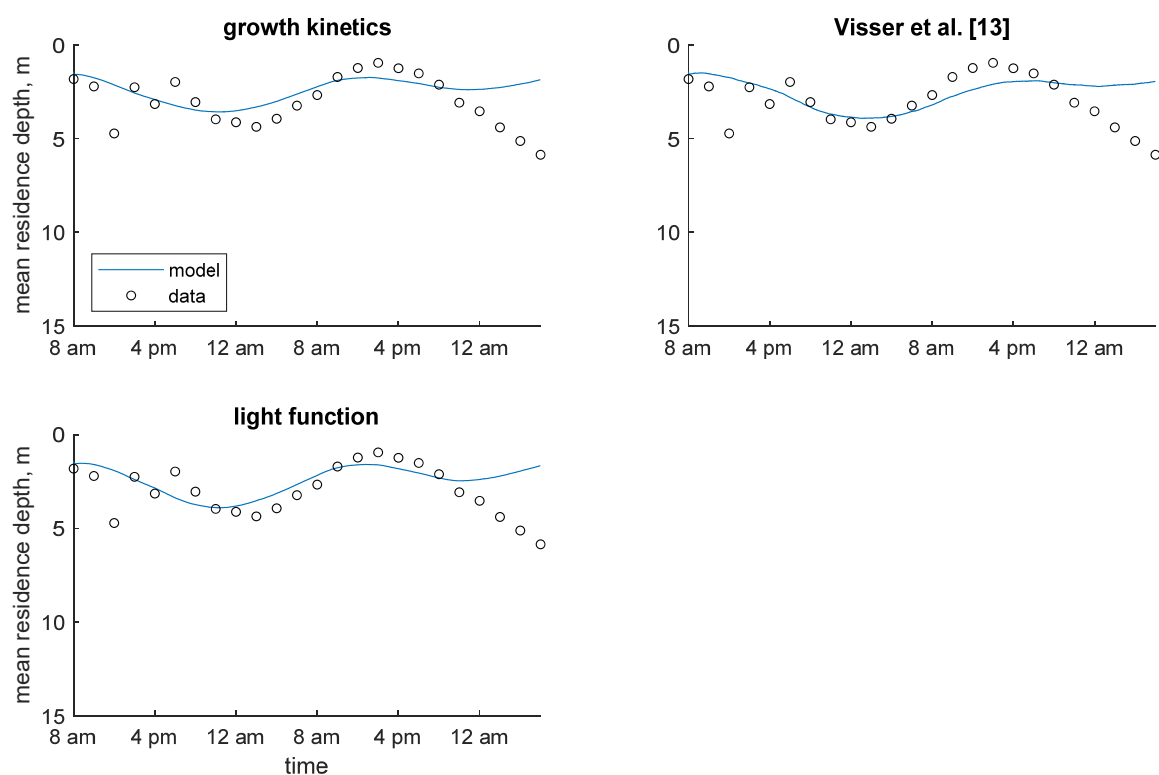

**Figure S14.** Time series of observed and predicted mean residence depth of chlorophyll a concentration in Shennong Stream open water site using dynamic velocity models (particle-tracking).

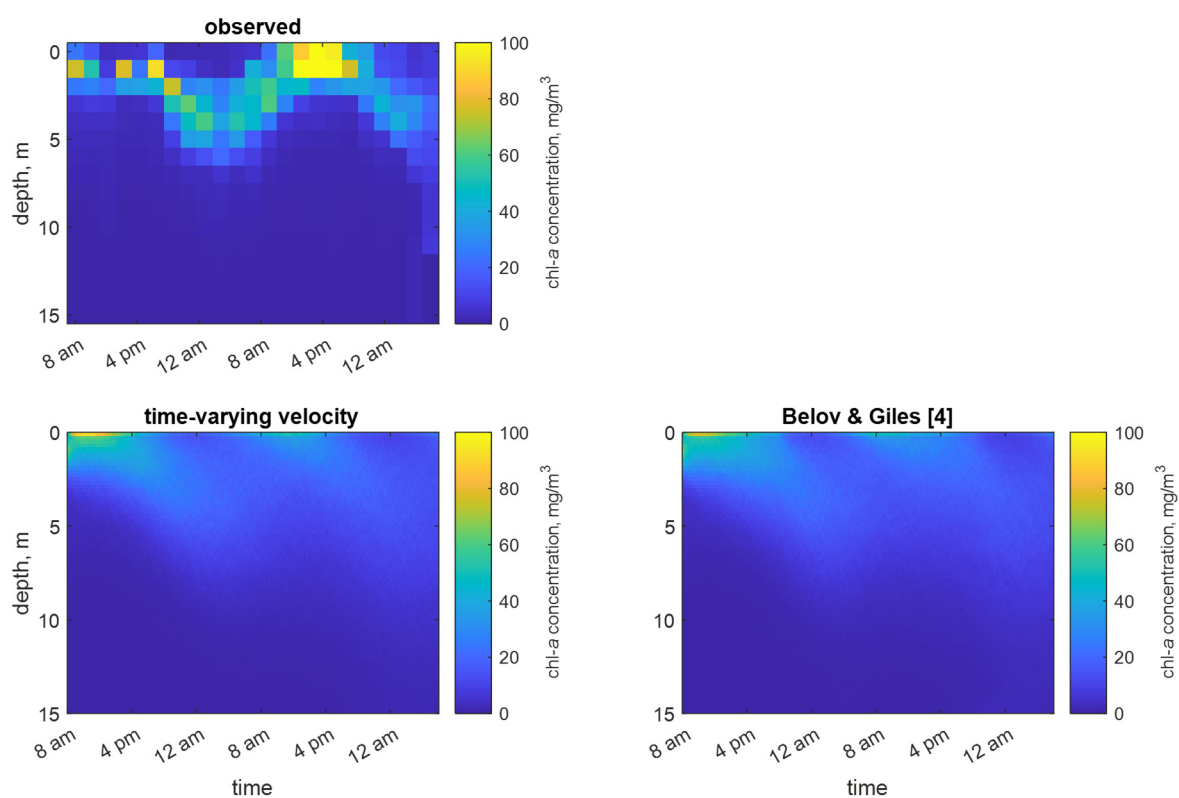

**Figure S15.** Time series of observed and predicted chlorophyll a concentration in Shennong Stream open water site using predefined velocity models (particle-tracking).

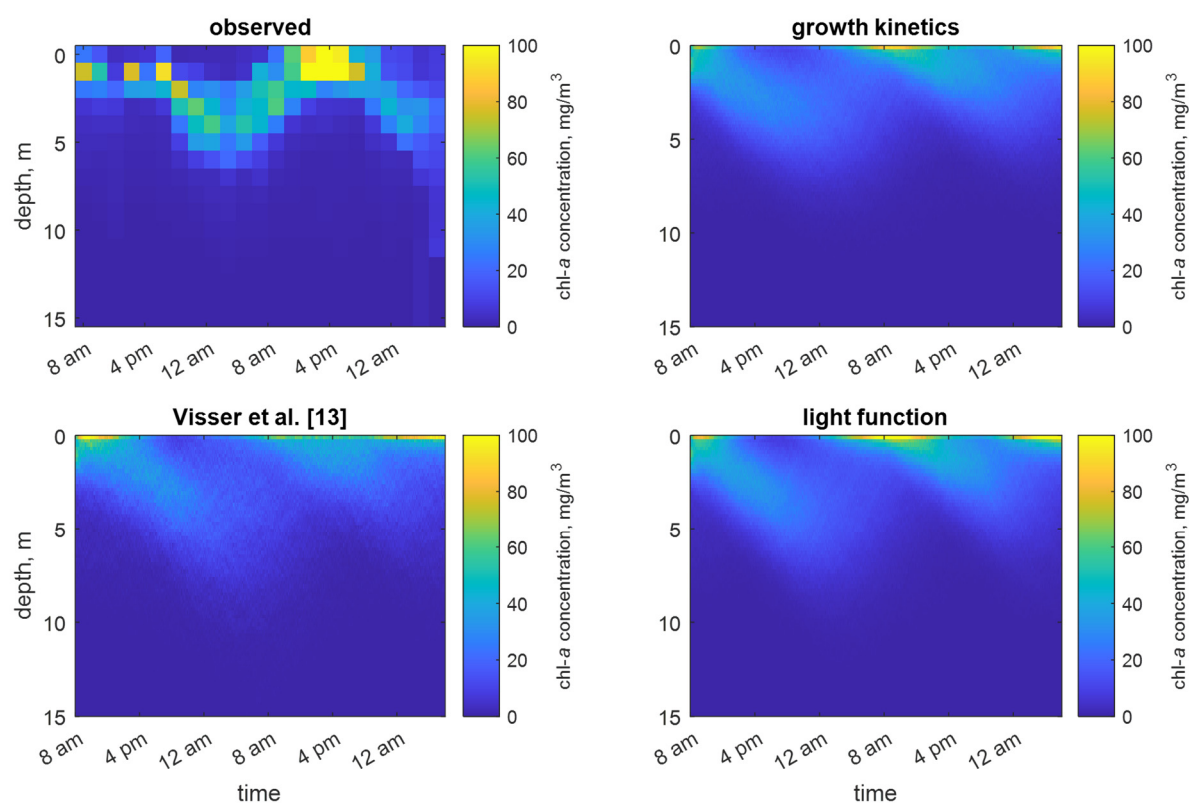

**Figure S16.** Time series of observed and predicted chlorophyll a concentration in Shennong Stream open water site using dynamic velocity models (particle-tracking).

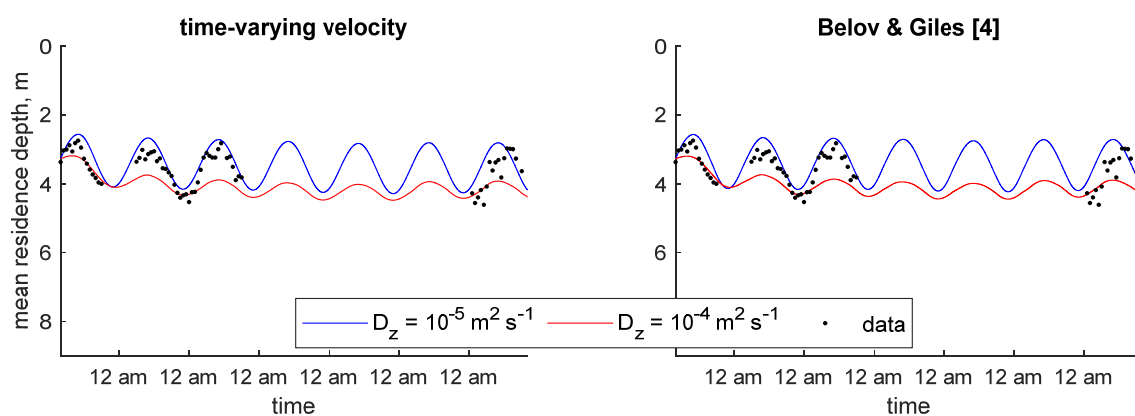

**Figure S17.** Time series of observed and predicted mean residence depth of chlorophyll a concentration in Xiangxi Bay using predefined velocity models (continuum).

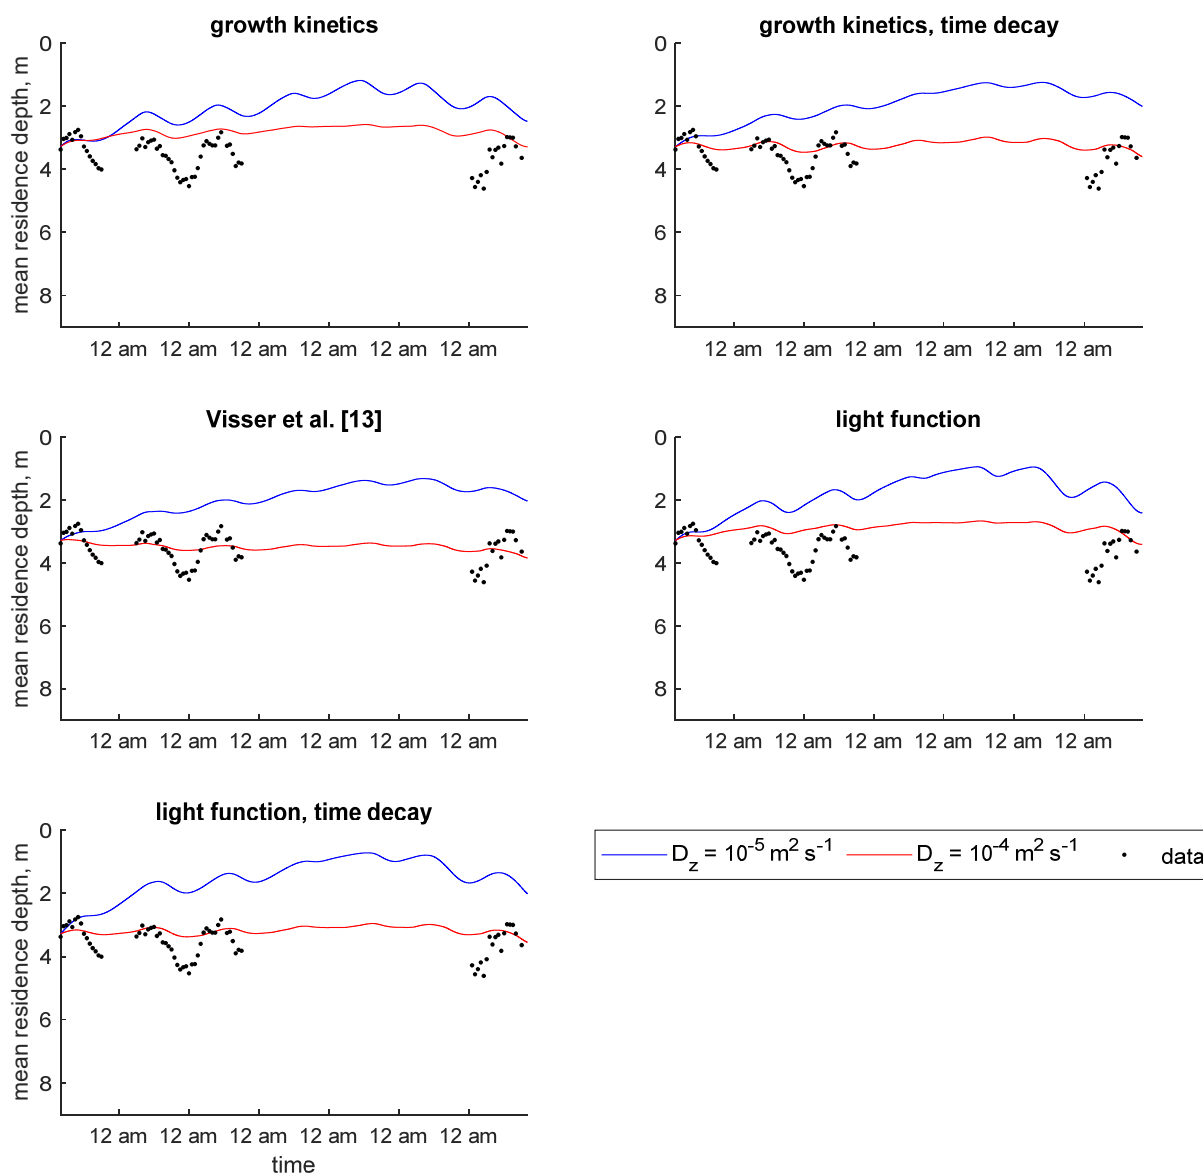

**Figure S18.** Time series of observed and predicted mean residence depth of chlorophyll a concentration in Xiangxi Bay using dynamic velocity models (continuum).

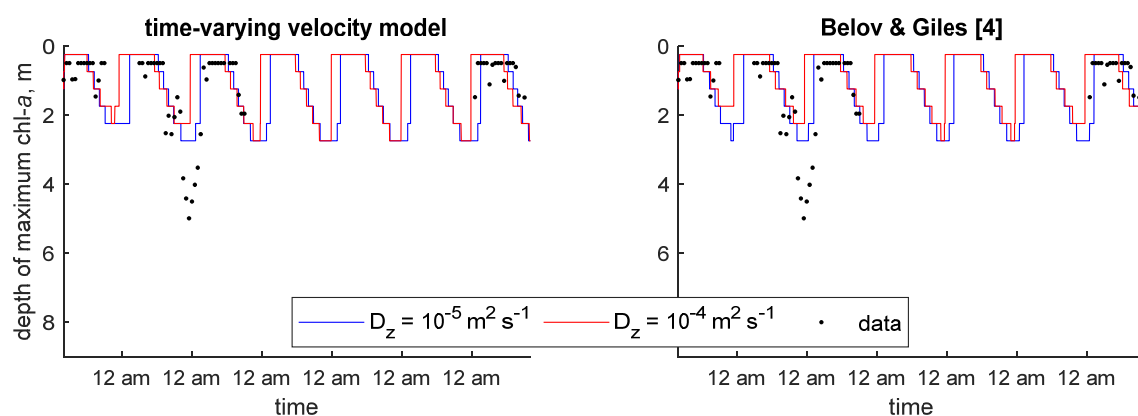

**Figure S19.** Time series of observed and predicted depth of maximum chlorophyll a concentration in Xiangxi Bay using predefined velocity models (continuum).

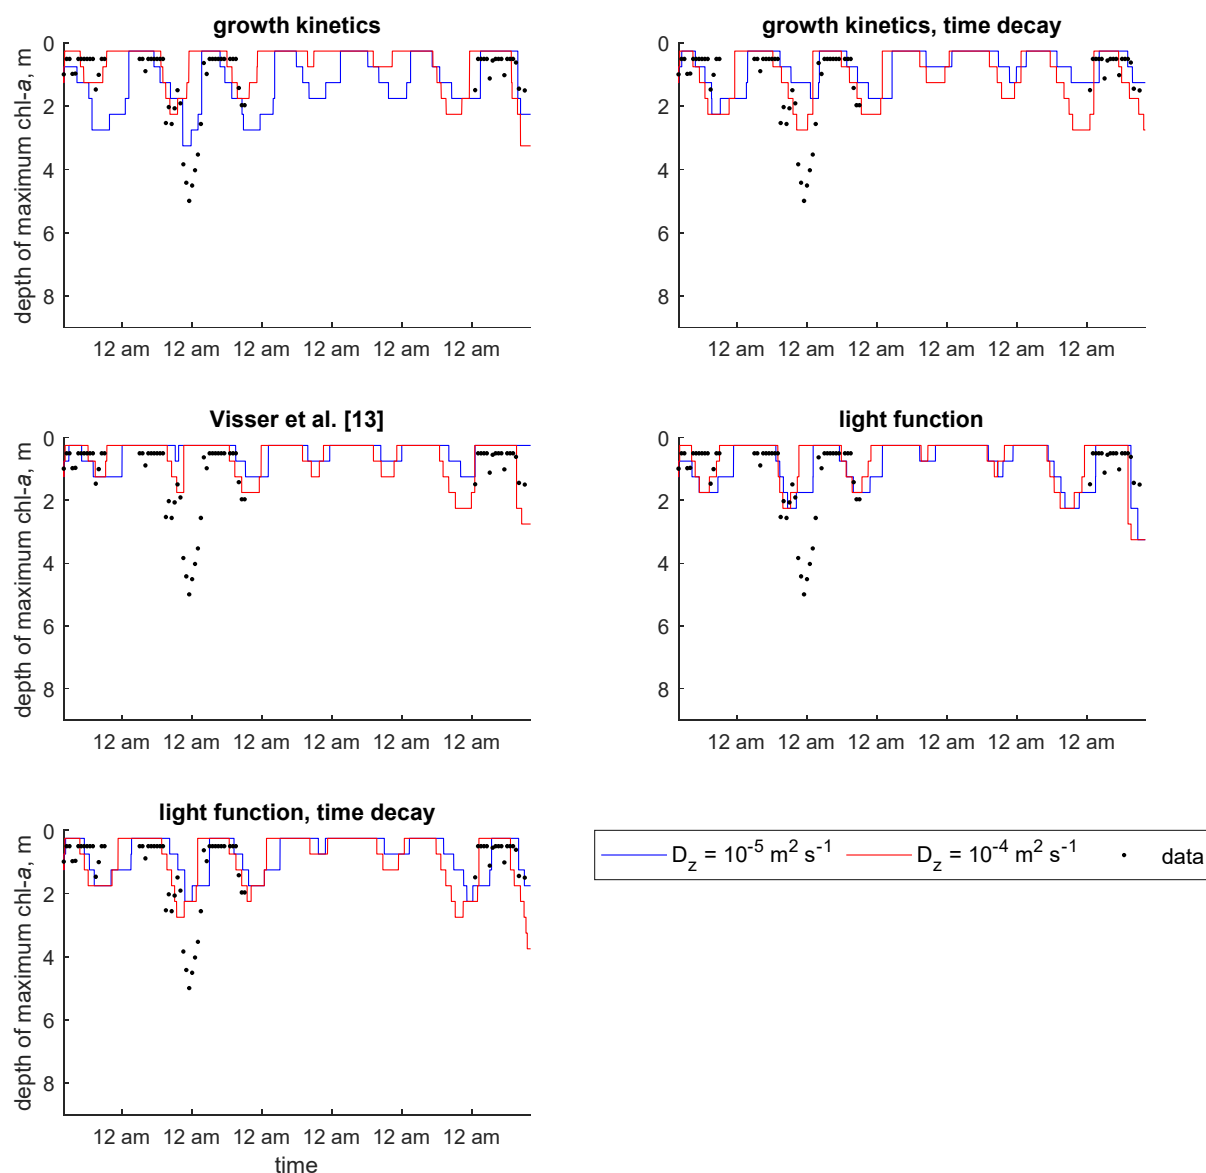

**Figure S20.** Time series of observed and predicted depth of maximum chlorophyll a concentration in Xiangxi Bay using dynamic velocity models (continuum).



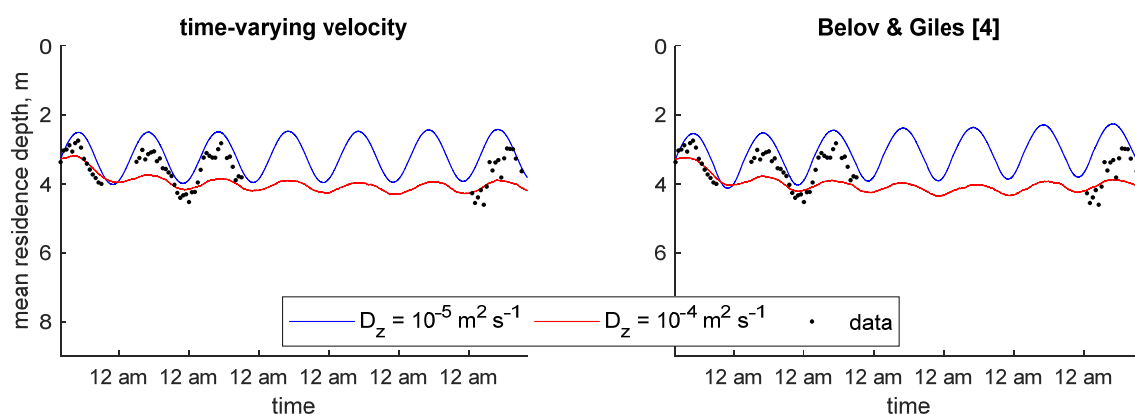

**Figure S21.** Time series of observed and predicted mean residence depth of chlorophyll a concentration in Xiangxi Bay using predefined velocity models (particle-tracking).

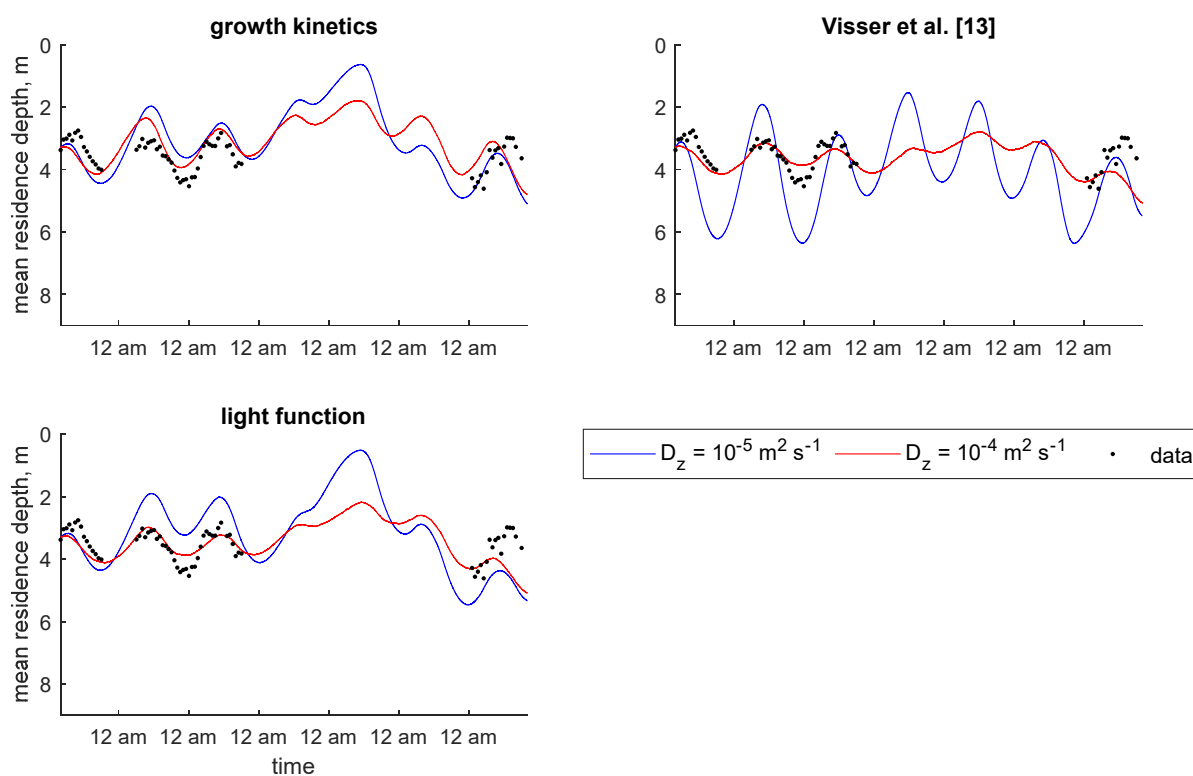

**Figure S22.** Time series of observed and predicted mean residence depth of chlorophyll a concentration in Xiangxi Bay using dynamic velocity models (particle-tracking).

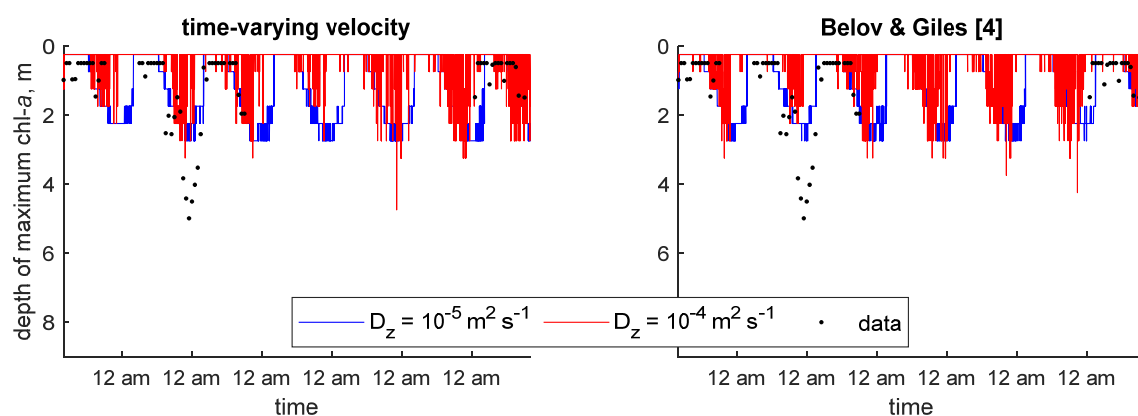

**Figure S23.** Time series of observed and predicted depth of maximum chlorophyll a concentration in Xiangxi Bay using predefined velocity models (particle-tracking).

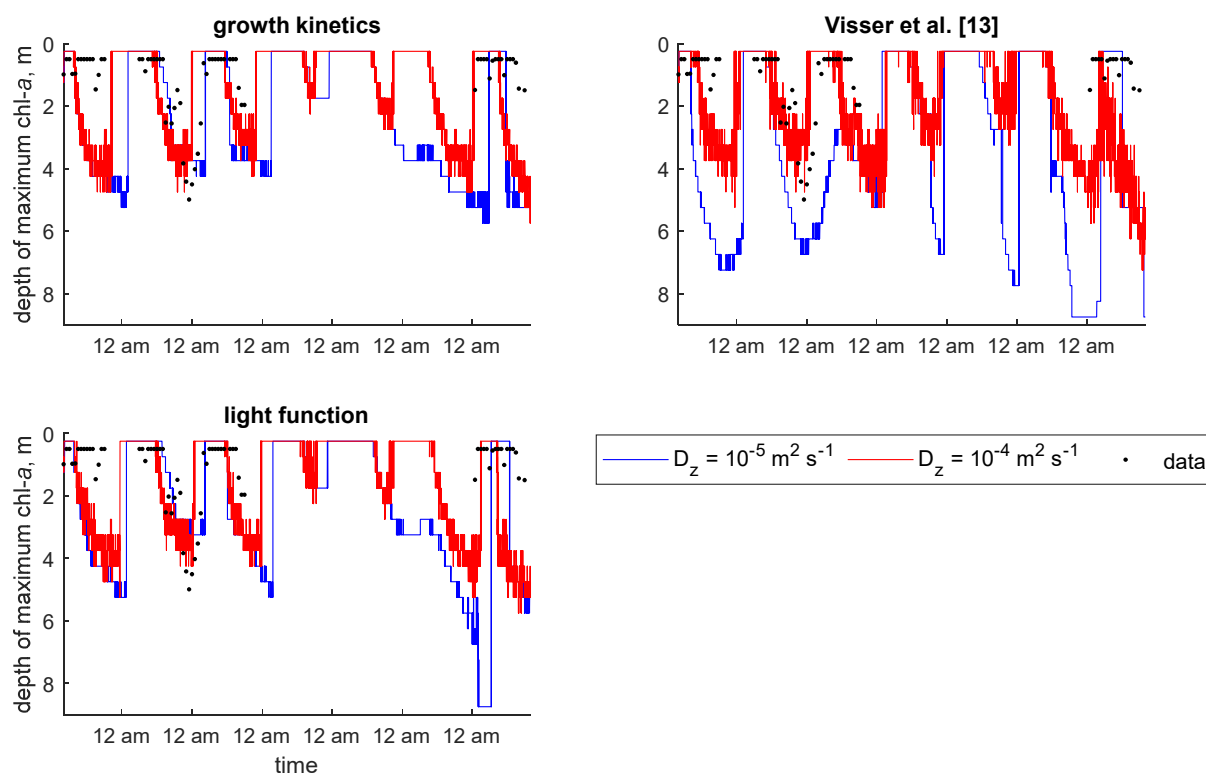

**Figure S24.** Time series of observed and predicted depth of maximum chlorophyll a concentration in Xiangxi Bay using dynamic velocity models (particle-tracking).
